# Supplementary material
Source: PubMed Central journal article supplement (PMC9767749)
Supplement: NIHMS1858183-supplement-Supplementary_Information.pdf [file NIHMS1858183-supplement-Supplementary_Information.pdf]

## Supporting information for:

In-depth mass spectrometry-based proteomics of formalin-fixed, paraffin embedded tissues with a spatial resolution of 50–200  $\mu\text{m}$

## Author List

Andikan J. Nwosu, Santosh A. Misal, Thy Truong, Richard H. Carson, Kei G. I. Webber, Nathaniel B. Axtell, Yiran Liang, S. Madisyn Johnston, Kenneth L. Virgin, Ethan G. Smith, George V. Thomas, Terry Morgan, John C. Price, Ryan T. Kelly\*

\*Corresponding author

Figure S1. AutoPOTS sample preparation workflow using the Opentrons OT2.  
Figure S2. Representative Pearson correlation plots for replicate analyses of 200  $\mu\text{m}$   $\times$  200  $\mu\text{m}$  sections of FFPE and frozen tissues.

Figure S3: Gene ontology plots with respect to cellular component, molecular function and biological process for proteins identified in frozen and FFPE tissues.  
Figure S4: Gravy score showing relative hydrophobicity of unique peptides from 200  $\mu\text{m}$  tissue squares.

Table S1: Proteome coverage achieved for 50  $\mu\text{m}$ , 100  $\mu\text{m}$  and 200  $\mu\text{m}$  fresh frozen and FFPE tissue squares.

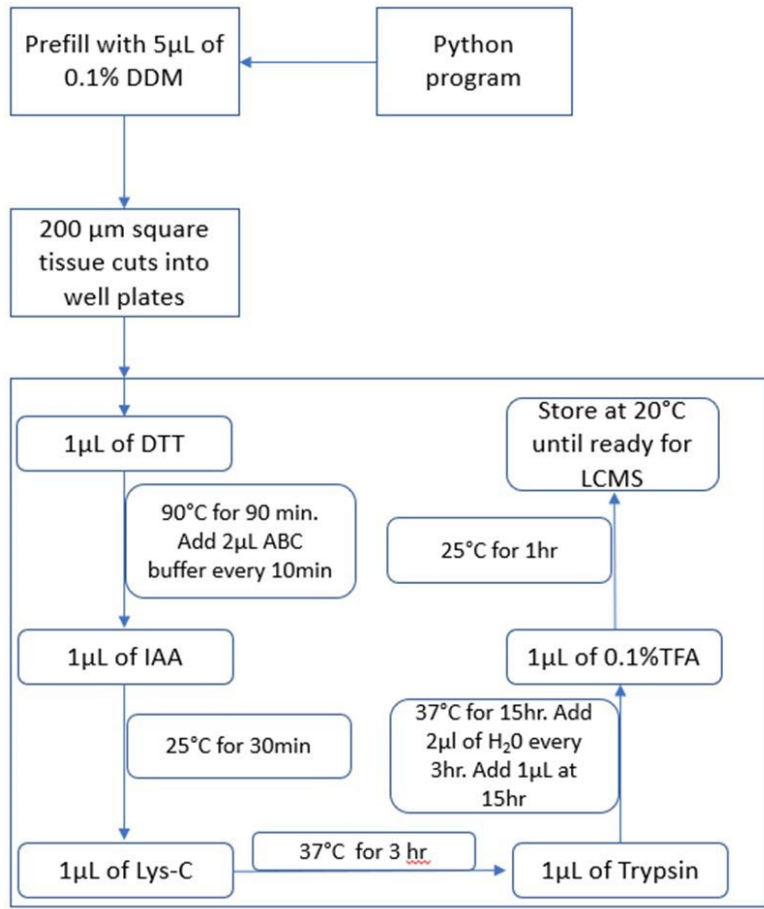

**Figure S1.** AutoPOTS sample preparation workflow using the Opentrons OT2.

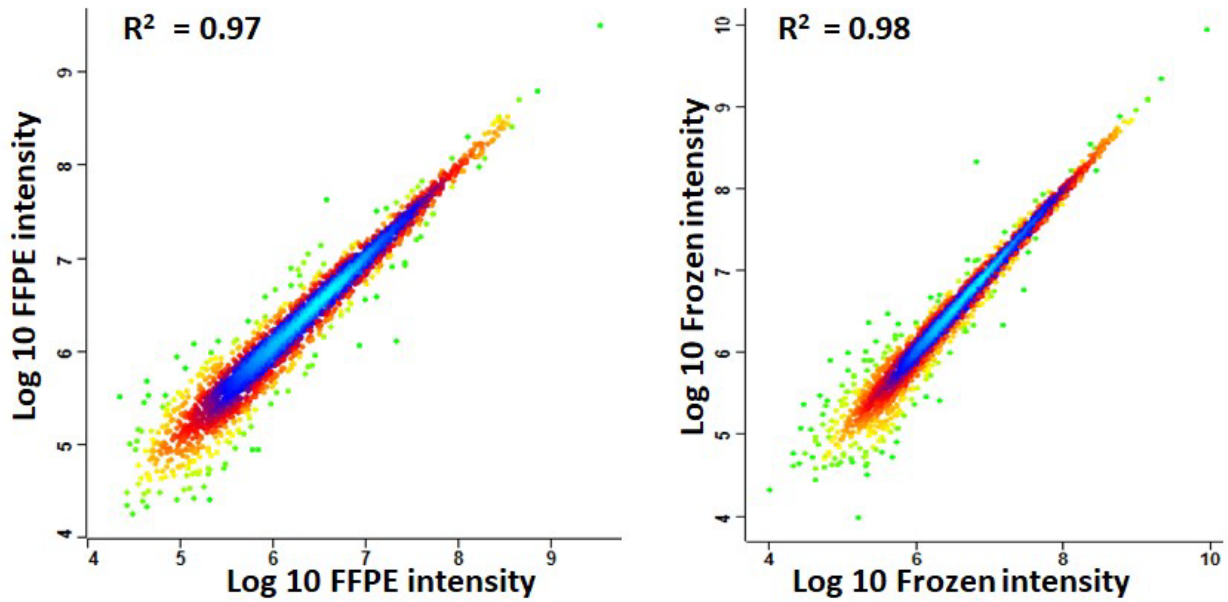

**Figure S2.** Representative Pearson correlation plots for replicate analyses of 200  $\mu\text{m} \times 200 \mu\text{m}$  sections of FFPE (left) and frozen (right) tissues.

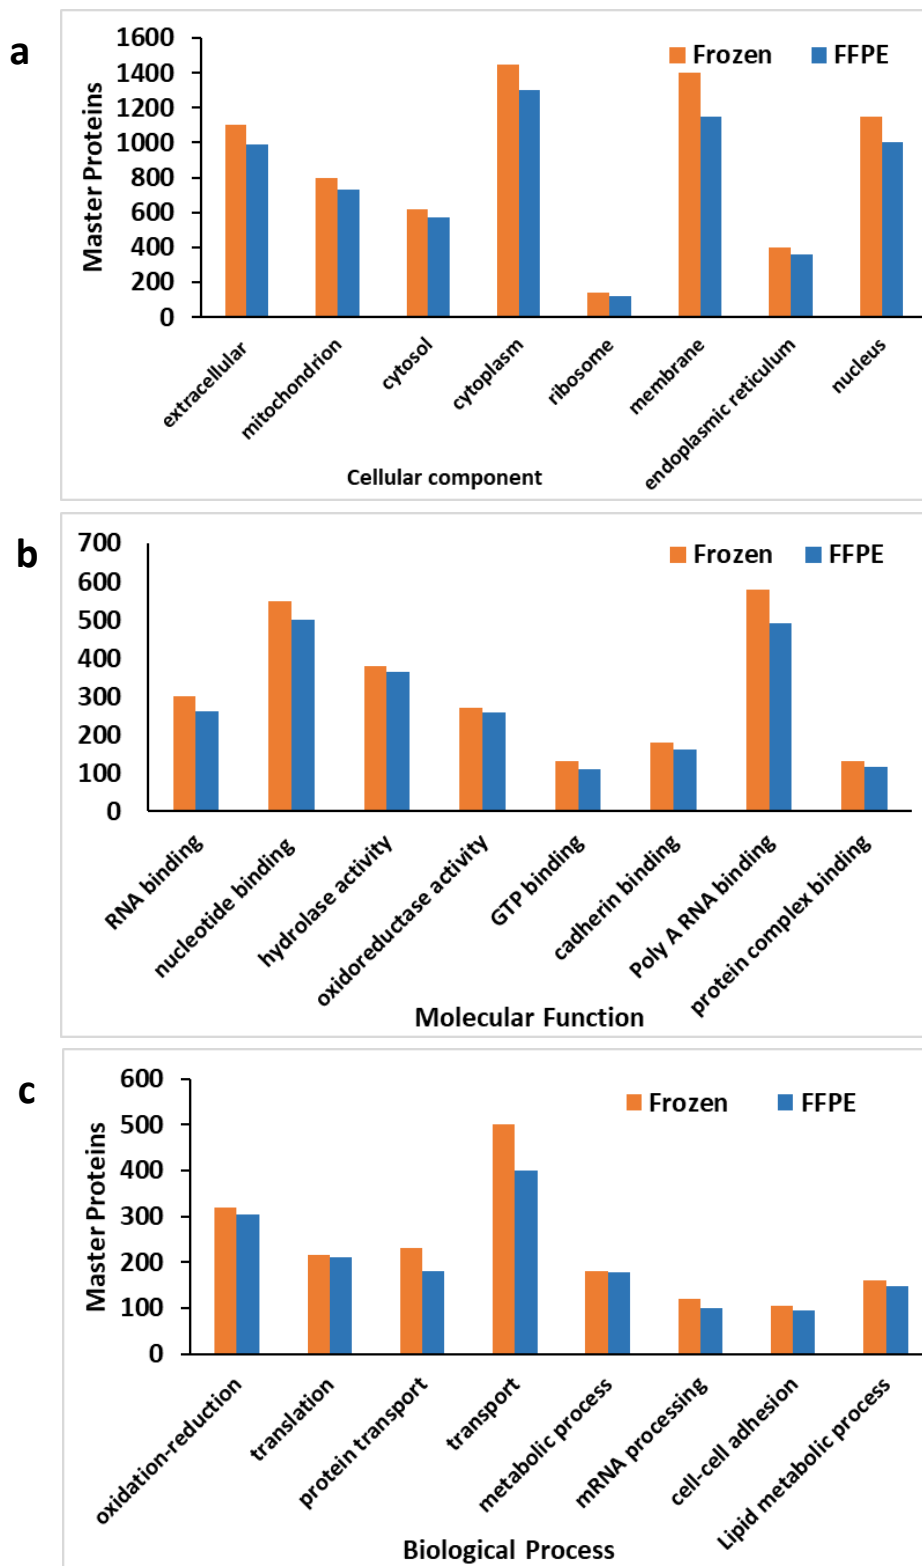

**Figure S3.** Gene ontology plots with respect to (a) cellular component, (b) molecular function and (c) biological process for proteins identified in frozen and FFPE tissues.

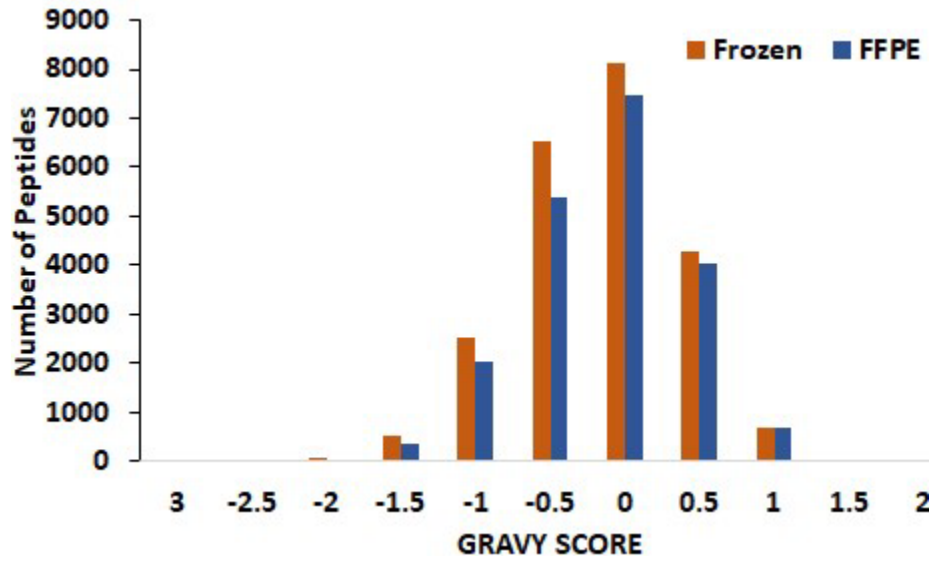

**Figure S4.** Gravy score showing the relative hydrophobicity of unique peptides from 200  $\mu\text{m} \times 200 \mu\text{m}$  frozen and FFPE tissue squares.

**Table S1.** Proteome coverage for 50  $\mu\text{m}$ , 100  $\mu\text{m}$  and 200  $\mu\text{m}$  fresh frozen and FFPE tissue squares. Peptide and protein coverage reported in parentheses include identifications based on MBR. Identifications are expressed as the mean  $\pm 1$  standard deviation ( $n = 4$ ).

| Tissue square size | Tissue sample & workflow | Peptide ID (with MBR in parentheses)   | Protein ID (with MBR in parentheses) |
|--------------------|--------------------------|----------------------------------------|--------------------------------------|
| 50 $\mu\text{m}$   | Frozen nanoPOTS          | 5000 $\pm$ 1200<br>(7000 $\pm$ 2000)   | 900 $\pm$ 200<br>(1300 $\pm$ 300)    |
| 50 $\mu\text{m}$   | FFPE nanoPOTS            | 4700 $\pm$ 100<br>(6100 $\pm$ 300)     | 850 $\pm$ 10<br>(1100 $\pm$ 80)      |
| 50 $\mu\text{m}$   | FFPE autoPOTS            | 2100 $\pm$ 200<br>(4200 $\pm$ 200)     | 480 $\pm$ 40<br>(920 $\pm$ 30)       |
| 100 $\mu\text{m}$  | Frozen nanoPOTS          | 18000 $\pm$ 3000<br>(27000 $\pm$ 2000) | 2300 $\pm$ 300<br>(2800 $\pm$ 200)   |
| 100 $\mu\text{m}$  | FFPE nanoPOTS            | 13000 $\pm$ 1000<br>(19600 $\pm$ 1100) | 1990 $\pm$ 80<br>(2490 $\pm$ 50)     |
| 100 $\mu\text{m}$  | FFPE autoPOTS            | 9100 $\pm$ 1900<br>(14000 $\pm$ 2000)  | 1400 $\pm$ 200<br>(1830 $\pm$ 150)   |
| 200 $\mu\text{m}$  | Frozen nanoPOTS          | 25000 $\pm$ 5000<br>(32000 $\pm$ 4000) | 2880 $\pm$ 140<br>(3180 $\pm$ 90)    |
| 200 $\mu\text{m}$  | FFPE nanoPOTS            | 20000 $\pm$ 400<br>(23800 $\pm$ 300)   | 2570 $\pm$ 40<br>(2770 $\pm$ 20)     |
| 200 $\mu\text{m}$  | FFPE autoPOTS            | 15800 $\pm$ 1600<br>(19100 $\pm$ 900)  | 1970 $\pm$ 120<br>(2150 $\pm$ 50)    |
